# Supplementary material
Source: HighWire-hosted journal article supplement (https://bmjopen.bmj.com/content/6/9/e011570)
Supplement: inline-supplementary-material-7 [file inline-supplementary-material-7.pdf]

***The first section is about your specific health related to your surgery or procedure from about 1 year ago. Please provide one answer for each question. Fill in the circle next to your answer. If you are unsure how to answer a question, please choose the one that fits best. You may skip questions you wish not to answer.***

1. Since your surgery (about one year ago), have you been able to return to work?
  - Yes
  - No (***skip to Question #4***)
  - Does not apply (***skip to Question #4***)
2. How much are you able to work now?
  - The same as before your surgery
  - More than before your surgery
  - Less than before your surgery
3. How long did it take for you to return to work?
  - Less than 1 month
  - 1 to 3 months
  - 3 to 6 months
  - More than 6 months
  - Prefer not to answer
4. How long did it take you to return to your normal life activities after your surgery:
  - less than 1 week,
  - 1-4 weeks
  - 1-3 months
  - 3-6 months
  - More than 6 months
  - I have yet fully recovered
5. **Since completing the previous Health & Well-being Survey (about 9 to 11 months ago),** did you receive medical care in any of the following locations? (please check all that apply)
  - Outpatient clinic visit
  - Urgent care center visit
  - Emergency room visit
  - Admitted to a hospital
  - Admitted to a long-term care hospital or inpatient rehabilitation facility
  - Underwent another surgery in an operating room
  - Other location
  - I did not receive any care
6. **Since completing the previous survey,** did you receive medical care for any of the following reasons? (please check all that apply)
  - Routine medical care RELATED to your surgery
  - Routine medical care NOT RELATED to your surgery
  - Non-routine medical care RELATED TO your surgery
  - Non-routine medical care NOT RELATED to your surgery
  - Radiation therapy or chemotherapy
  - I received care for a different reason
  - I did not receive any care?
7. **Since completing the previous survey,** did you receive medical treatment **FOR FOLLOW-UP?** (Fill in all that apply)

- You needed another procedure or follow-up from your surgery?
- On-going treatment such as chemotherapy or radiation?
- None

**8. Since completing the previous survey, did you receive medical treatment **FOR PROBLEMS WITH YOUR HEART?** (Fill in all that apply)**

- Heart attack?
- Your heart stopped beating (cardiac arrest)?
- Heart failure (congestive heart failure)?
- Abnormal heart rhythm such as atrial fibrillation?
- Severe pain coming from your heart (angina)?
- None

**9. Since completing the previous survey, did you receive medical treatment **FOR PROBLEMS WITH BLOOD CLOTS?** (Fill in all that apply)**

- Blood clot in your leg (Deep vein thrombosis)?
- Blood clot in your lung (Pulmonary embolism)?
- None

**10. Since completing the previous survey, did you receive medical treatment **FOR PROBLEMS WITH YOUR LUNGS OR BREATHING?** (Fill in all that apply)**

- You stopped breathing (respiratory arrest)?
- You were placed on a breathing machine because you were struggling to breathe on your own (respiratory failure)?
- An infection in your lungs (pneumonia)?
- None

**11. Since completing the previous survey, did you receive medical treatment **FOR PROBLEMS WITH YOUR KIDNEYS, STOMACH OR INTESTINE?** (Fill in all that apply)**

- Kidney failure and you needed kidney dialysis?
- GI bleed (internal bleeding from your stomach or intestine)?
- Stomach or intestinal ulcer?
- None

**12. Since completing the previous survey, did you receive medical treatment **FOR ANY OTHER PROBLEMS?** (Fill in all that apply)**

- Stroke (for example, weakness on one side of the body or difficulty speaking)?
- Nerve injury/paralysis related to your procedure?
- Other (specify): \_\_\_\_\_
- None

**13. Since completing the previous survey, how many times have you had a fall, including a slip or trip in which you lost your balance and landed on the floor or ground or lower level?**

- Zero (0) (Please skip to question #20)
- One time (1)
- Two times (2)
- Three or more (>2)

**14. Did your fall result in any of the following? (Circle all that apply)**

- No injury
- Bruising, sprains or cuts
- Reduced mobility
- A fear of falling

- Severe pain
- Injury causing you to seek medical treatment
- Broken bone
- Head injury
- A change from independent living to assisted living

15. How does your **CURRENT** use of pain medications compare to your use ONE YEAR AGO?

- I take LESS pain medication than I did one year ago
- I take MORE pain medication than I did one year ago
- I take the SAME amount of pain medication than I did one year ago
- I take pain medications now, but did not one year ago
- I am not taking pain medications now, and did not one year ago
- Prefer not to answer

*The next section is about your **CURRENT** general health. These questions do not necessarily relate to your procedure from about 1 year ago. Please provide one answer for each question. Fill in the circle next to your answer. If you are unsure how to answer a question, please choose the one that fits best.*

16. In general, would you say your health is:

- Excellent
- Very good
- Good
- Fair
- Poor

17. Does **your health now limit you** in moderate activities, such as moving a table, pushing a vacuum cleaner, bowling, or playing golf? If so, how much?

- Yes, limited a lot
- Yes, limited a little
- No, not limited at all

18. Does **your health now limit** you in climbing several flights of stairs? If so, how much?

- Yes, limited a lot
- Yes, limited a little
- No, not limited at all

19. As a result of your physical health, during the **past 4 weeks**, have you accomplished less than you would like with your work or other regular daily activities?

- No, none of the time
- Yes, a little of the time
- Yes, some of the time
- Yes, most of the time
- Yes, all of the time

20. As a result of your physical health, during the **past 4 weeks**, were you limited in the kind of work or other activities?

- No, none of the time
- Yes, a little of the time
- Yes, some of the time
- Yes, most of the time
- Yes, all of the time

21. As a result of any emotional problems (such as feeling depressed or anxious), during the **past 4 weeks**, have you accomplished less than you would like with your work or other regular daily activities?
- No, none of the time
  - Yes, a little of the time
  - Yes, some of the time
  - Yes, most of the time
  - Yes, all of the time
22. As a result of any emotional problems (such as feeling depressed or anxious), during the **past 4 weeks**, have you not done work or other activities as carefully as usual?
- No, none of the time
  - Yes, a little of the time
  - Yes, some of the time
  - Yes, most of the time
  - Yes, all of the time
23. During the **past 4 weeks**, how much did pain interfere with your normal work (including both work outside the home and housework)?
- Not at all
  - A little bit
  - Moderately
  - Quite a bit
  - Extremely
24. How much of the time during the **past 4 weeks** have you felt calm and peaceful?
- All of the time
  - Most of the time
  - A good bit of the time
  - Some of the time
  - A little bit of the time
  - None of the time
25. How much of the time during the **past 4 weeks** did you have a lot of energy?
- All of the time
  - Most of the time
  - A good bit of the time
  - Some of the time
  - A little bit of the time
  - None of the time
26. How much of the time during the **past 4 weeks** have you felt downhearted and blue?
- All of the time
  - Most of the time
  - A good bit of the time
  - Some of the time
  - A little bit of the time
  - None of the time
27. How much of the time during the **past 4 weeks** has your physical health or emotional problems interfered with your social activities (like visiting with friends, relatives, etc.)?
- All of the time

- Most of the time
- Some of the time
- A little bit of the time
- None of the time

28. Compared to one year ago, how would you rate your **physical** health in general **now**?

- Much better
- Slightly better
- About the same
- Slightly worse
- Much worse

29. Compared to one year ago, how would you rate your **emotional** problems **now**? (Such as feeling anxious, depressed or irritable)

- Much better
- Slightly better
- About the same
- Slightly worse
- Much worse

30. Currently, do you have any pain in your surgical incision or in the area related to your surgery?

- Yes
- No (Skip to question 34)

31. Did this pain start after the surgery?

- Yes
- No

32. On a scale of zero to ten, with zero being no pain and ten being the worst pain, please fill in your average level of this pain **during the last week**.

|                          |                          |                          |                          |                          |                          |                          |                          |                          |                          |                          |
|--------------------------|--------------------------|--------------------------|--------------------------|--------------------------|--------------------------|--------------------------|--------------------------|--------------------------|--------------------------|--------------------------|
| 0                        | 1                        | 2                        | 3                        | 4                        | 5                        | 6                        | 7                        | 8                        | 9                        | 10                       |
| <input type="checkbox"/> | <input type="checkbox"/> | <input type="checkbox"/> | <input type="checkbox"/> | <input type="checkbox"/> | <input type="checkbox"/> | <input type="checkbox"/> | <input type="checkbox"/> | <input type="checkbox"/> | <input type="checkbox"/> | <input type="checkbox"/> |

33. If you have pain in the surgical area, do you experience any of the following in that area symptoms (check all that apply)

- Numbness
- Decrease sensation to cold or touch
- Increased sensation to cold or touch

34. **In the past 7 days** has your thinking been slow?

- Never
- Rarely (Once)
- Sometimes (Two or three times)
- Often (About once a day)
- Very often (Several times a day)

35. **In the past 7 days** has it seemed like your brain was not working as well as usual?

- Never
- Rarely (Once)
- Sometimes (Two or three times)
- Often (About once a day)
- Very often (Several times a day)

**36. In the past 7 days** have you had to work harder than usual to keep track of what you were doing?

- Never
- Rarely (Once)
- Sometimes (Two or three times)
- Often (About once a day)
- Very often (Several times a day)

**37. In the past 7 days** have you had trouble shifting back and forth between different activities that require thinking?

- Never
- Rarely (Once)
- Sometimes (Two or three times)
- Often (About once a day)
- Very often (Several times a day)

**38. In the past 7 days** has your mind been as sharp as usual?

- Not at all
- A little bit
- Somewhat
- Quite a bit
- Very much

**39. In the past 7 days** has your memory been as good as usual?

- Not at all
- A little bit
- Somewhat
- Quite a bit
- Very much

**40. In the past 7 days** has your thinking been as fast as usual?

- Not at all
- A little bit
- Somewhat
- Quite a bit
- Very much

**41. In the past 7 days** have you been able to keep track of what you are doing, even if you are interrupted?

- Not at all
- A little bit
- Somewhat
- Quite a bit
- Very much

**The following questions are about your ability to care for yourself independently now. To be dependent means you need help with a task. To be independent means you can complete a task without help.**

**42. In relation to feeding yourself, you are...**

- unable
- needing some help (i.e. cutting, spreading butter)
- independent

**43. In relation to bathing/showering, you are...**

- dependent
- independent

**44.** In relation to grooming, you are...

- needing some help with personal care
- independent (i.e. brushing hair, brushing teeth, shaving)

**45.** In relation to dressing, you are...

- dependent
- needing some help, but can do about half unaided
- independent (including buttons, zips, laces, etc.)

**46.** In relation to your bowels (defecation), you are...

- incontinent/unable to control bowels (or need to be given enemas)
- having occasional accidents
- continent/able to control bowels

**47.** In relation to your bladder (urination), you are...

- incontinent/unable to control bladder (or catheterized and unable to manage alone)
- having occasional accidents
- continent/able to control bladder

**48.** In relation to using the toilet, you are...

- dependent
- needing some help, but can do some things alone
- independent (on and off the toilet, dressing, wiping)

**49.** In relation to transferring from a bed to a chair and back, you are...

- unable (no sitting balance)
- needing major help but are able to sit (one or two people physically helping)
- needing minor help (verbal encouragement or physical help)
- independent

**50.** In relation to your mobility (walking) on level surfaces, you are...

- immobile (unable to walk or move about) for less than 50 yards
- wheelchair independent, including corners, greater than 50 yards
- walking with the help of one person (either verbal encouragement or physical help) greater than 50 yards
- independent (with or without a cane or walker) greater than 50 yards

**51.** In relation to climbing a flight of stairs, you are...

- unable
- needing help (verbal encouragement, physical help, carrying aid)
- independent
